# Supplementary material for: Transcriptomic Analysis Reveals Involvement of the Macrophage Migration Inhibitory Factor Gene Network in Duchenne Muscular Dystrophy
Source: MDPI journal article supplement (doi:10.3390/genes10110939), 2019-11-18
Supplement: s1 [file s1]

## Suppl. Figure Legend

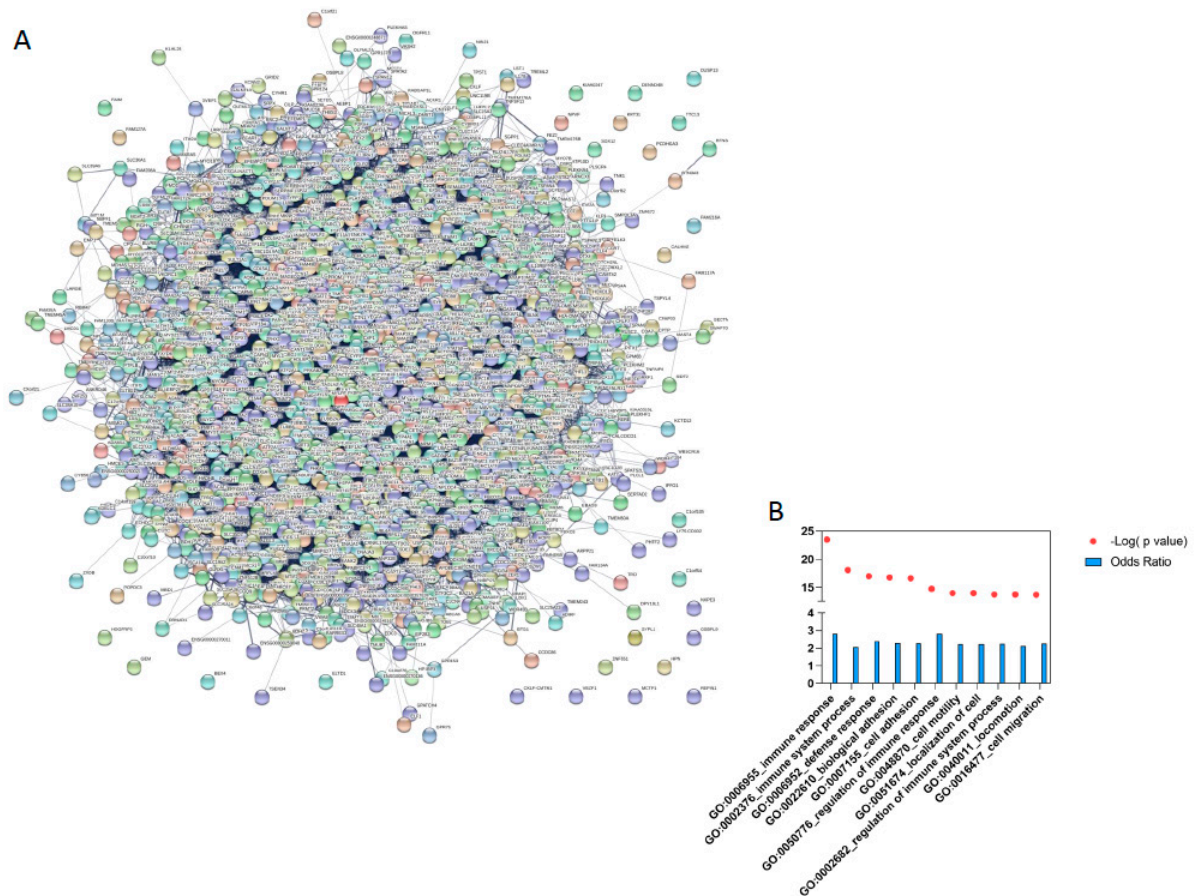

**Figure 1.** Network of the most significant genes from the meta-analysis **(A)** Gene network of the 2000 top genes altered in the Meta-analysis is plotted using STRING. The edges connecting the nodes represent the interactions between genes, in terms of co-expression (black), text mining (light green), protein homology (cyan), association in curated database (light blue), and high-throughput experiments (purple). Empty nodes represent proteins of uncharacterized 3D structure, while filled nodes represent proteins with known or predicted tertiary structure. Gene Enrichment Biological Process of the Meta-Analysis **(B)** Enrichment analysis is performed with Imago webtool. Red dots represent the significance of the annotations as Log (p-value), while blue histograms show the Odds Ratio for each category tested. It is shown a significant up-regulation of the immune response (p-value  $3.2 \times 10^{-24}$ ) and of the immune system (p-value  $8.2 \times 10^{-19}$ ).
