# Supplementary material for: Transcriptomic Analysis Reveals Involvement of the Macrophage Migration Inhibitory Factor Gene Network in Duchenne Muscular Dystrophy
Source: MDPI journal article supplement (doi:10.3390/genes10110939), 2019-11-18
Supplement: s1 [file s1]

**Table S1. Node-node interactions of the MIF network.** The GeneMania database was used to construct the MIF network, based on Physical Interaction, Co-expression, Predicted, Co-localization, Pathway, Genetic Interactions and Shared protein domains. Input genes were: *MIF*, *DDT*, *CD74*, *CD44*, *CXCR2*, *CXCR4*, *CXCR7* (a.k.a. *ACKR3*), and *COPS5*. Overall, the network included 48 unique genes with 81 multi-edge node pairs.

| Gene 1   | Gene 2  | Weight   | Network group | Network                    |
|----------|---------|----------|---------------|----------------------------|
| COPS5    | MIF     | 0.020473 | Co-expression | Dobbin-Giordano-2005       |
| EIF3H    | RNF139  | 0.018245 | Co-expression | Dobbin-Giordano-2005       |
| VAV2     | NTSR2   | 0.004407 | Co-expression | Dobbin-Giordano-2005       |
| COX8A    | MIF     | 0.011951 | Co-expression | Dobbin-Giordano-2005       |
| COX8A    | COPS5   | 0.015342 | Co-expression | Dobbin-Giordano-2005       |
| HLA-DMA  | CD74    | 0.003402 | Co-expression | Dobbin-Giordano-2005       |
| COPS6    | COPS5   | 0.022982 | Co-expression | Dobbin-Giordano-2005       |
| EPCAM    | TACSTD2 | 0.010718 | Co-expression | Dobbin-Giordano-2005       |
| CXCR1    | NTSR2   | 0.003798 | Co-expression | Dobbin-Giordano-2005       |
| HLA-DPB1 | CD74    | 0.004239 | Co-expression | Dobbin-Giordano-2005       |
| HLA-DPB1 | HLA-DMA | 0.004542 | Co-expression | Dobbin-Giordano-2005       |
| LAMTOR5  | EIF3H   | 0.017657 | Co-expression | Dobbin-Giordano-2005       |
| LYVE1    | CTSF    | 0.012665 | Co-expression | Dobbin-Giordano-2005       |
| USP14    | COPS5   | 0.024571 | Co-expression | Dobbin-Giordano-2005       |
| USP14    | COX8A   | 0.012683 | Co-expression | Dobbin-Giordano-2005       |
| HBEGF    | CXCL8   | 0.018402 | Co-expression | Dobbin-Giordano-2005       |
| CCKAR    | NTSR2   | 0.004951 | Co-expression | Dobbin-Giordano-2005       |
| CXCR4    | CXCR2   | 0.014793 | Co-expression | Wu-Garvey-2007             |
| EIF3H    | COPS5   | 0.003911 | Co-expression | Wu-Garvey-2007             |
| EIF3F    | CD74    | 0.008444 | Co-expression | Wu-Garvey-2007             |
| EIF3F    | CTSF    | 0.007781 | Co-expression | Wu-Garvey-2007             |
| EIF3F    | GTF3A   | 0.005326 | Co-expression | Wu-Garvey-2007             |
| CXCR1    | CXCR4   | 0.009696 | Co-expression | Wu-Garvey-2007             |
| LAMTOR5  | EIF3F   | 0.004476 | Co-expression | Wu-Garvey-2007             |
| COPS3    | EIF3H   | 0.008541 | Co-expression | Wu-Garvey-2007             |
| ST13     | COPS5   | 0.003524 | Co-expression | Wu-Garvey-2007             |
| CXCR4    | CD74    | 0.0118   | Co-expression | Burington-Shaughnessy-2008 |
| GTF3A    | EIF3H   | 0.016951 | Co-expression | Burington-Shaughnessy-2008 |
| EPCAM    | ACKR3   | 0.018327 | Co-expression | Burington-Shaughnessy-2008 |
| EIF3F    | CTSF    | 0.007426 | Co-expression | Burington-Shaughnessy-2008 |
| EIF3F    | EIF3H   | 0.007358 | Co-expression | Burington-Shaughnessy-2008 |
| HLA-DPB1 | CXCL12  | 0.007375 | Co-expression | Burington-Shaughnessy-2008 |
| HLA-DPB1 | HLA-DMA | 0.010809 | Co-expression | Burington-Shaughnessy-2008 |
| CXCR4    | CD74    | 0.006724 | Co-expression | Boldrick-Relman-2002       |
| VAV2     | CXCR2   | 0.020885 | Co-expression | Boldrick-Relman-2002       |

|          |         |          |                      |                      |
|----------|---------|----------|----------------------|----------------------|
| HLA-DMA  | CXCR4   | 0.009169 | Co-expression        | Boldrick-Relman-2002 |
| HLA-DPB1 | ACKR3   | 0.00545  | Co-expression        | Boldrick-Relman-2002 |
| HLA-DPB1 | CD74    | 0.003015 | Co-expression        | Boldrick-Relman-2002 |
| HLA-DPB1 | HLA-DMA | 0.004373 | Co-expression        | Boldrick-Relman-2002 |
| ST13     | COP55   | 0.012436 | Co-expression        | Boldrick-Relman-2002 |
| CD74     | DDT     | 0.003213 | Genetic Interactions | Lin-Smith-2010       |
| CXCR2    | DDT     | 0.001281 | Genetic Interactions | Lin-Smith-2010       |
| CXCR4    | CXCR2   | 0.000933 | Genetic Interactions | Lin-Smith-2010       |
| CXCR4    | CD44    | 0.000694 | Genetic Interactions | Lin-Smith-2010       |
| CXCL12   | CD44    | 0.000523 | Genetic Interactions | Lin-Smith-2010       |
| DMP1     | ACKR3   | 0.001393 | Genetic Interactions | Lin-Smith-2010       |
| DMP1     | MIF     | 0.002854 | Genetic Interactions | Lin-Smith-2010       |
| DMP1     | CD44    | 0.000873 | Genetic Interactions | Lin-Smith-2010       |
| UCHL1    | CD44    | 0.000693 | Genetic Interactions | Lin-Smith-2010       |
| UCHL1    | CXCL12  | 0.000342 | Genetic Interactions | Lin-Smith-2010       |
| COL14A1  | DMP1    | 0.001237 | Genetic Interactions | Lin-Smith-2010       |
| RGS12    | BNIP1   | 0.001357 | Genetic Interactions | Lin-Smith-2010       |
| VAV2     | MIF     | 0.002372 | Genetic Interactions | Lin-Smith-2010       |
| VAV2     | CD74    | 0.00245  | Genetic Interactions | Lin-Smith-2010       |
| CXCL8    | CXCR4   | 0.00078  | Genetic Interactions | Lin-Smith-2010       |
| CXCL8    | CXCL12  | 0.000588 | Genetic Interactions | Lin-Smith-2010       |
| COX8A    | VAV2    | 0.001082 | Genetic Interactions | Lin-Smith-2010       |
| TACSTD2  | CXCL12  | 0.000937 | Genetic Interactions | Lin-Smith-2010       |
| ATP13A2  | CXCR4   | 0.003035 | Genetic Interactions | Lin-Smith-2010       |
| EPCAM    | CXCR4   | 0.000715 | Genetic Interactions | Lin-Smith-2010       |
| GRK3     | CD74    | 0.002588 | Genetic Interactions | Lin-Smith-2010       |
| GRK3     | UCHL1   | 0.000501 | Genetic Interactions | Lin-Smith-2010       |
| GRK3     | RGS12   | 0.00072  | Genetic Interactions | Lin-Smith-2010       |
| IGFBP3   | EPCAM   | 0.001338 | Genetic Interactions | Lin-Smith-2010       |
| IGFBP3   | EIF3F   | 0.003026 | Genetic Interactions | Lin-Smith-2010       |
| ADRA1A   | CXCL12  | 0.00034  | Genetic Interactions | Lin-Smith-2010       |
| LAMTOR5  | CXCR4   | 0.00125  | Genetic Interactions | Lin-Smith-2010       |
| DSTYK    | MIF     | 0.002857 | Genetic Interactions | Lin-Smith-2010       |
| DSTYK    | EIF3H   | 0.001342 | Genetic Interactions | Lin-Smith-2010       |
| DSTYK    | CXCL8   | 0.000983 | Genetic Interactions | Lin-Smith-2010       |
| DSTYK    | GRK3    | 0.000632 | Genetic Interactions | Lin-Smith-2010       |
| LYVE1    | GRK3    | 0.001104 | Genetic Interactions | Lin-Smith-2010       |
| LYVE1    | DSTYK   | 0.001259 | Genetic Interactions | Lin-Smith-2010       |
| COPS3    | CD44    | 0.00138  | Genetic Interactions | Lin-Smith-2010       |
| COPS3    | DSTYK   | 0.001138 | Genetic Interactions | Lin-Smith-2010       |
| HBEGF    | BNIP1   | 0.002979 | Genetic Interactions | Lin-Smith-2010       |
| ST13     | UCHL1   | 0.001158 | Genetic Interactions | Lin-Smith-2010       |
| CCKAR    | NTSR2   | 0.003091 | Genetic Interactions | Lin-Smith-2010       |

|         |       |          |                       |                             |
|---------|-------|----------|-----------------------|-----------------------------|
| CCKAR   | ST13  | 0.001631 | Genetic Interactions  | Lin-Smith-2010              |
| CD74    | MIF   | 0.720807 | Physical Interactions | IREF-BIND                   |
| CXCL12  | CXCR4 | 0.940235 | Physical Interactions | IREF-BIND                   |
| BNIP1   | MIF   | 0.230385 | Physical Interactions | IREF-BIND                   |
| CXCR1   | CXCL8 | 0.521285 | Physical Interactions | IREF-BIND                   |
| CD74    | MIF   | 0.440914 | Physical Interactions | BIOGRID-SMALL-SCALE-STUDIES |
| COPS5   | MIF   | 0.031229 | Physical Interactions | BIOGRID-SMALL-SCALE-STUDIES |
| CXCL12  | CXCR4 | 0.150551 | Physical Interactions | BIOGRID-SMALL-SCALE-STUDIES |
| BNIP1   | MIF   | 0.225817 | Physical Interactions | BIOGRID-SMALL-SCALE-STUDIES |
| UCHL1   | COPS5 | 0.011161 | Physical Interactions | BIOGRID-SMALL-SCALE-STUDIES |
| COL14A1 | CD44  | 0.213284 | Physical Interactions | BIOGRID-SMALL-SCALE-STUDIES |
| RGS12   | CXCR2 | 0.272348 | Physical Interactions | BIOGRID-SMALL-SCALE-STUDIES |
| VAV2    | CD44  | 0.064289 | Physical Interactions | BIOGRID-SMALL-SCALE-STUDIES |
| CXCL8   | CXCR2 | 0.256641 | Physical Interactions | BIOGRID-SMALL-SCALE-STUDIES |
| GTF3A   | CXCR2 | 0.237576 | Physical Interactions | BIOGRID-SMALL-SCALE-STUDIES |
| ATP13A2 | ACKR3 | 0.200508 | Physical Interactions | BIOGRID-SMALL-SCALE-STUDIES |
| ATP13A2 | CXCR4 | 0.01659  | Physical Interactions | BIOGRID-SMALL-SCALE-STUDIES |
| COPS6   | COPS5 | 0.012099 | Physical Interactions | BIOGRID-SMALL-SCALE-STUDIES |
| GRK3    | CXCR4 | 0.1637   | Physical Interactions | BIOGRID-SMALL-SCALE-STUDIES |
| IGFBP3  | CD44  | 0.04173  | Physical Interactions | BIOGRID-SMALL-SCALE-STUDIES |
| LAMTOR5 | CD74  | 0.16512  | Physical Interactions | BIOGRID-SMALL-SCALE-STUDIES |
| COPS3   | COPS5 | 0.010025 | Physical Interactions | BIOGRID-SMALL-SCALE-STUDIES |
| COPS3   | COPS6 | 0.028202 | Physical Interactions | BIOGRID-SMALL-SCALE-STUDIES |
| USP14   | CXCR4 | 0.072892 | Physical Interactions | BIOGRID-SMALL-SCALE-STUDIES |
| HBEGF   | CD44  | 0.079285 | Physical Interactions | BIOGRID-SMALL-SCALE-STUDIES |
| AMH     | COPS5 | 0.209435 | Physical Interactions | BIOGRID-SMALL-SCALE-STUDIES |
| ST13    | CXCR2 | 0.125709 | Physical Interactions | BIOGRID-SMALL-SCALE-STUDIES |
| ST13    | CXCR4 | 0.06617  | Physical Interactions | BIOGRID-SMALL-SCALE-STUDIES |

|          |       |          |                       |                             |
|----------|-------|----------|-----------------------|-----------------------------|
| BRCC3    | COPS5 | 0.019148 | Physical Interactions | BIOGRID-SMALL-SCALE-STUDIES |
| CD74     | MIF   | 0.308792 | Physical Interactions | IREF-BIOGRID                |
| COPS5    | MIF   | 0.004278 | Physical Interactions | IREF-BIOGRID                |
| CXCL12   | CXCR4 | 0.154938 | Physical Interactions | IREF-BIOGRID                |
| BNIP1    | MIF   | 0.08035  | Physical Interactions | IREF-BIOGRID                |
| UCHL1    | COPS5 | 0.002302 | Physical Interactions | IREF-BIOGRID                |
| COL14A1  | CD44  | 0.180092 | Physical Interactions | IREF-BIOGRID                |
| RGS12    | CXCR2 | 0.293855 | Physical Interactions | IREF-BIOGRID                |
| VAV2     | CD44  | 0.018483 | Physical Interactions | IREF-BIOGRID                |
| CXCL8    | CXCR2 | 0.143705 | Physical Interactions | IREF-BIOGRID                |
| GTF3A    | CXCR2 | 0.27779  | Physical Interactions | IREF-BIOGRID                |
| ATP13A2  | ACKR3 | 0.193558 | Physical Interactions | IREF-BIOGRID                |
| ATP13A2  | CXCR4 | 0.020981 | Physical Interactions | IREF-BIOGRID                |
| COPS6    | COPS5 | 0.000519 | Physical Interactions | IREF-BIOGRID                |
| EIF3F    | EIF3H | 0.016239 | Physical Interactions | IREF-BIOGRID                |
| GRK3     | CXCR4 | 0.164392 | Physical Interactions | IREF-BIOGRID                |
| IGFBP3   | CD44  | 0.044728 | Physical Interactions | IREF-BIOGRID                |
| DSTYK    | DDT   | 0.428263 | Physical Interactions | IREF-BIOGRID                |
| COPS3    | COPS5 | 0.001956 | Physical Interactions | IREF-BIOGRID                |
| COPS3    | COPS6 | 0.003959 | Physical Interactions | IREF-BIOGRID                |
| USP14    | CXCR4 | 0.033472 | Physical Interactions | IREF-BIOGRID                |
| USP14    | COPS5 | 0.002311 | Physical Interactions | IREF-BIOGRID                |
| HBEGF    | CD44  | 0.087266 | Physical Interactions | IREF-BIOGRID                |
| AMH      | COPS5 | 0.012252 | Physical Interactions | IREF-BIOGRID                |
| ST13     | CXCR2 | 0.084032 | Physical Interactions | IREF-BIOGRID                |
| ST13     | CXCR4 | 0.043125 | Physical Interactions | IREF-BIOGRID                |
| ST13     | VAV2  | 0.019751 | Physical Interactions | IREF-BIOGRID                |
| BRCC3    | COPS5 | 0.002512 | Physical Interactions | IREF-BIOGRID                |
| CXCR4    | CD74  | 0.115724 | Physical Interactions | IREF-INTACT                 |
| COPS5    | MIF   | 0.023423 | Physical Interactions | IREF-INTACT                 |
| UCHL1    | COPS5 | 0.029864 | Physical Interactions | IREF-INTACT                 |
| CXCL8    | CXCR2 | 0.438321 | Physical Interactions | IREF-INTACT                 |
| ATP13A2  | ACKR3 | 0.073324 | Physical Interactions | IREF-INTACT                 |
| ATP13A2  | CXCR4 | 0.025381 | Physical Interactions | IREF-INTACT                 |
| HLA-DQA1 | CD74  | 0.135741 | Physical Interactions | IREF-INTACT                 |
| COPS6    | MIF   | 0.018174 | Physical Interactions | IREF-INTACT                 |
| DSTYK    | DDT   | 0.270535 | Physical Interactions | IREF-INTACT                 |
| DSTYK    | MIF   | 0.062623 | Physical Interactions | IREF-INTACT                 |
| USP14    | COPS5 | 0.09164  | Physical Interactions | IREF-INTACT                 |
| ST13     | VAV2  | 0.020156 | Physical Interactions | IREF-INTACT                 |
| MIF      | DDT   | 0.645584 | Predicted             | Wu-Stein-2010               |
| CD74     | MIF   | 0.106819 | Predicted             | Wu-Stein-2010               |
| CXCR4    | CXCR2 | 0.034322 | Predicted             | Wu-Stein-2010               |
| CTSF     | CD74  | 0.469814 | Predicted             | Wu-Stein-2010               |

|          |        |          |                        |               |
|----------|--------|----------|------------------------|---------------|
| NTSR2    | CXCR2  | 0.500937 | Predicted              | Wu-Stein-2010 |
| DMP1     | CD44   | 0.364803 | Predicted              | Wu-Stein-2010 |
| UCHL1    | MIF    | 0.308777 | Predicted              | Wu-Stein-2010 |
| RNF139   | COP55  | 0.349848 | Predicted              | Wu-Stein-2010 |
| COL14A1  | CD44   | 0.103879 | Predicted              | Wu-Stein-2010 |
| EIF3H    | COP55  | 0.169901 | Predicted              | Wu-Stein-2010 |
| VAV2     | CD44   | 0.226558 | Predicted              | Wu-Stein-2010 |
| COX8A    | MIF    | 0.161149 | Predicted              | Wu-Stein-2010 |
| HLA-DMA  | CD74   | 0.19275  | Predicted              | Wu-Stein-2010 |
| HLA-DQA1 | CD74   | 0.107949 | Predicted              | Wu-Stein-2010 |
| HLA-DQA1 | CXCR4  | 0.053159 | Predicted              | Wu-Stein-2010 |
| COP56    | COP55  | 0.120707 | Predicted              | Wu-Stein-2010 |
| EIF3F    | COP55  | 0.123082 | Predicted              | Wu-Stein-2010 |
| FPR2     | CXCR2  | 0.142713 | Predicted              | Wu-Stein-2010 |
| CXCR1    | CXCR2  | 0.084536 | Predicted              | Wu-Stein-2010 |
| GRK3     | CXCR4  | 0.040105 | Predicted              | Wu-Stein-2010 |
| HLA-DPB1 | CD74   | 0.127471 | Predicted              | Wu-Stein-2010 |
| IGFBP3   | CD44   | 0.061121 | Predicted              | Wu-Stein-2010 |
| ADRA1A   | CXCR2  | 0.1292   | Predicted              | Wu-Stein-2010 |
| ADRA1A   | CXCR1  | 0.137639 | Predicted              | Wu-Stein-2010 |
| COP53    | COP55  | 0.197019 | Predicted              | Wu-Stein-2010 |
| USP14    | COP55  | 0.109278 | Predicted              | Wu-Stein-2010 |
| HBEGF    | CD44   | 0.065261 | Predicted              | Wu-Stein-2010 |
| CCKAR    | CXCR2  | 0.112857 | Predicted              | Wu-Stein-2010 |
| MIF      | DDT    | 0.5      | Shared protein domains | PFAM          |
| CXCR2    | ACKR3  | 0.003514 | Shared protein domains | PFAM          |
| CXCR4    | ACKR3  | 0.003658 | Shared protein domains | PFAM          |
| CXCR4    | CXCR2  | 0.003627 | Shared protein domains | PFAM          |
| DDTL     | DDT    | 0.5      | Shared protein domains | PFAM          |
| DDTL     | MIF    | 0.5      | Shared protein domains | PFAM          |
| NTSR2    | ACKR3  | 0.003544 | Shared protein domains | PFAM          |
| NTSR2    | CXCR2  | 0.003514 | Shared protein domains | PFAM          |
| NTSR2    | CXCR4  | 0.003658 | Shared protein domains | PFAM          |
| EIF3H    | COP55  | 0.088474 | Shared protein domains | PFAM          |
| CXCL8    | CXCL12 | 0.022222 | Shared protein domains | PFAM          |

|          |          |          |                        |      |
|----------|----------|----------|------------------------|------|
| TACSTD2  | CD74     | 0.096679 | Shared protein domains | PFAM |
| HLA-DQA1 | HLA-DMA  | 0.078386 | Shared protein domains | PFAM |
| COPS6    | COPS5    | 0.066196 | Shared protein domains | PFAM |
| COPS6    | EIF3H    | 0.066196 | Shared protein domains | PFAM |
| EPCAM    | CD74     | 0.096679 | Shared protein domains | PFAM |
| EPCAM    | TACSTD2  | 0.096679 | Shared protein domains | PFAM |
| EIF3F    | COPS5    | 0.066196 | Shared protein domains | PFAM |
| EIF3F    | EIF3H    | 0.066196 | Shared protein domains | PFAM |
| EIF3F    | COPS6    | 0.111219 | Shared protein domains | PFAM |
| FPR2     | ACKR3    | 0.003544 | Shared protein domains | PFAM |
| FPR2     | CXCR2    | 0.003514 | Shared protein domains | PFAM |
| FPR2     | CXCR4    | 0.003658 | Shared protein domains | PFAM |
| FPR2     | NTSR2    | 0.003544 | Shared protein domains | PFAM |
| CXCR1    | ACKR3    | 0.003544 | Shared protein domains | PFAM |
| CXCR1    | CXCR2    | 0.003514 | Shared protein domains | PFAM |
| CXCR1    | CXCR4    | 0.003658 | Shared protein domains | PFAM |
| CXCR1    | NTSR2    | 0.003544 | Shared protein domains | PFAM |
| CXCR1    | FPR2     | 0.003544 | Shared protein domains | PFAM |
| GRK3     | RGS12    | 0.011036 | Shared protein domains | PFAM |
| HLA-DPB1 | HLA-DMA  | 0.017238 | Shared protein domains | PFAM |
| HLA-DPB1 | HLA-DQA1 | 0.017238 | Shared protein domains | PFAM |
| IGFBP3   | CD74     | 0.055422 | Shared protein domains | PFAM |
| IGFBP3   | TACSTD2  | 0.055422 | Shared protein domains | PFAM |
| IGFBP3   | EPCAM    | 0.055422 | Shared protein domains | PFAM |
| ADRA1A   | ACKR3    | 0.003544 | Shared protein domains | PFAM |
| ADRA1A   | CXCR2    | 0.003514 | Shared protein domains | PFAM |

|        |        |          |                        |          |
|--------|--------|----------|------------------------|----------|
| ADRA1A | CXCR4  | 0.003658 | Shared protein domains | PFAM     |
| ADRA1A | NTSR2  | 0.003544 | Shared protein domains | PFAM     |
| ADRA1A | FPR2   | 0.003544 | Shared protein domains | PFAM     |
| ADRA1A | CXCR1  | 0.003544 | Shared protein domains | PFAM     |
| MPND   | COPS5  | 0.088473 | Shared protein domains | PFAM     |
| MPND   | EIF3H  | 0.088473 | Shared protein domains | PFAM     |
| MPND   | COPS6  | 0.066196 | Shared protein domains | PFAM     |
| MPND   | EIF3F  | 0.066196 | Shared protein domains | PFAM     |
| LYVE1  | CD44   | 0.12245  | Shared protein domains | PFAM     |
| SUSD5  | CD44   | 0.12245  | Shared protein domains | PFAM     |
| SUSD5  | LYVE1  | 0.12245  | Shared protein domains | PFAM     |
| BRCC3  | COPS5  | 0.088474 | Shared protein domains | PFAM     |
| BRCC3  | EIF3H  | 0.088474 | Shared protein domains | PFAM     |
| BRCC3  | COPS6  | 0.066196 | Shared protein domains | PFAM     |
| BRCC3  | EIF3F  | 0.066196 | Shared protein domains | PFAM     |
| BRCC3  | MPND   | 0.088473 | Shared protein domains | PFAM     |
| CCKAR  | ACKR3  | 0.003658 | Shared protein domains | PFAM     |
| CCKAR  | CXCR2  | 0.003627 | Shared protein domains | PFAM     |
| CCKAR  | NTSR2  | 0.003658 | Shared protein domains | PFAM     |
| CCKAR  | FPR2   | 0.003658 | Shared protein domains | PFAM     |
| CCKAR  | CXCR1  | 0.003658 | Shared protein domains | PFAM     |
| CCKAR  | ADRA1A | 0.003658 | Shared protein domains | PFAM     |
| MIF    | DDT    | 0.5      | Shared protein domains | INTERPRO |
| DDTL   | DDT    | 0.5      | Shared protein domains | INTERPRO |
| DDTL   | MIF    | 0.5      | Shared protein domains | INTERPRO |
| EIF3H  | COPS5  | 0.093544 | Shared protein domains | INTERPRO |

|          |          |          |                        |          |
|----------|----------|----------|------------------------|----------|
| CXCL8    | CXCL12   | 0.01755  | Shared protein domains | INTERPRO |
| TACSTD2  | CD74     | 0.12571  | Shared protein domains | INTERPRO |
| HLA-DQA1 | HLA-DMA  | 0.041896 | Shared protein domains | INTERPRO |
| COPS6    | COPS5    | 0.069395 | Shared protein domains | INTERPRO |
| COPS6    | EIF3H    | 0.069395 | Shared protein domains | INTERPRO |
| EPCAM    | CD74     | 0.12571  | Shared protein domains | INTERPRO |
| EPCAM    | TACSTD2  | 0.125711 | Shared protein domains | INTERPRO |
| EIF3F    | COPS5    | 0.069395 | Shared protein domains | INTERPRO |
| EIF3F    | EIF3H    | 0.069395 | Shared protein domains | INTERPRO |
| EIF3F    | COPS6    | 0.115446 | Shared protein domains | INTERPRO |
| FPR2     | ACKR3    | 0.008256 | Shared protein domains | INTERPRO |
| FPR2     | CXCR2    | 0.007546 | Shared protein domains | INTERPRO |
| FPR2     | CXCR4    | 0.004277 | Shared protein domains | INTERPRO |
| FPR2     | NTSR2    | 0.00756  | Shared protein domains | INTERPRO |
| CXCR1    | CXCR2    | 0.133662 | Shared protein domains | INTERPRO |
| CXCR1    | FPR2     | 0.007546 | Shared protein domains | INTERPRO |
| GRK3     | RGS12    | 0.006683 | Shared protein domains | INTERPRO |
| HLA-DPB1 | HLA-DMA  | 0.020753 | Shared protein domains | INTERPRO |
| HLA-DPB1 | HLA-DQA1 | 0.020753 | Shared protein domains | INTERPRO |
| IGFBP3   | CD74     | 0.042247 | Shared protein domains | INTERPRO |
| IGFBP3   | TACSTD2  | 0.042247 | Shared protein domains | INTERPRO |
| IGFBP3   | EPCAM    | 0.042247 | Shared protein domains | INTERPRO |
| ADRA1A   | FPR2     | 0.00536  | Shared protein domains | INTERPRO |
| MPND     | COPS5    | 0.093544 | Shared protein domains | INTERPRO |
| MPND     | EIF3H    | 0.093544 | Shared protein domains | INTERPRO |
| MPND     | COPS6    | 0.069395 | Shared protein domains | INTERPRO |



|       |       |          |                        |          |
|-------|-------|----------|------------------------|----------|
| MPND  | EIF3F | 0.069395 | Shared protein domains | INTERPRO |
| LYVE1 | CD44  | 0.054116 | Shared protein domains | INTERPRO |
| SUSD5 | CD44  | 0.043092 | Shared protein domains | INTERPRO |
| SUSD5 | LYVE1 | 0.043092 | Shared protein domains | INTERPRO |
| BRCC3 | COPS5 | 0.093544 | Shared protein domains | INTERPRO |
| BRCC3 | EIF3H | 0.093544 | Shared protein domains | INTERPRO |
| BRCC3 | COPS6 | 0.069395 | Shared protein domains | INTERPRO |
| BRCC3 | EIF3F | 0.069395 | Shared protein domains | INTERPRO |
| BRCC3 | MPND  | 0.093544 | Shared protein domains | INTERPRO |
| CCKAR | FPR2  | 0.007546 | Shared protein domains | INTERPRO |
