# Supplementary material for: Transcriptomic Analysis Reveals Involvement of the Macrophage Migration Inhibitory Factor Gene Network in Duchenne Muscular Dystrophy
Source: MDPI journal article supplement (doi:10.3390/genes10110939), 2019-11-18
Supplement: s1 [file s1]

**Table S2. Most interconnected DEG in the Network of the Meta-analysis:** Cytoscape was interrogated to analyze the STRING Network. This table provides a list of the 50 most interconnected genes in the Network of the Meta-analysis, sorted by degree. Betweenness Centrality, Closeness Centrality and Degree has been considered for centrality parameters of the network. CD44, CXCR4 and CXCL12 are in the top interconnected genes, showing respectively 160, 110 and 104 connections.

| Gene   | Degree | BetweennessCentrality | ClosenessCentrality |
|--------|--------|-----------------------|---------------------|
| GAPDH  | 324    | 0.08614166            | 0.50774336          |
| FN1    | 218    | 0.02825168            | 0.4642225           |
| VEGFA  | 195    | 0.02637694            | 0.46375347          |
| ACTB   | 181    | 0.02965857            | 0.47028689          |
| APP    | 167    | 0.02154225            | 0.44955926          |
| CD44   | 160    | 0.01289183            | 0.44552293          |
| CASP3  | 152    | 0.01892317            | 0.45762712          |
| PTPRC  | 149    | 0.00961433            | 0.4336325           |
| ITGAM  | 145    | 0.00843399            | 0.4369056           |
| PTEN   | 142    | 0.01851706            | 0.44836165          |
| RHOA   | 141    | 0.01729869            | 0.43965517          |
| STAT1  | 132    | 0.01473616            | 0.43393997          |
| MMP2   | 122    | 0.00798742            | 0.42977528          |
| CCL2   | 122    | 0.00688346            | 0.43353011          |
| MAPK14 | 119    | 0.01279147            | 0.43745533          |
| ITGB2  | 118    | 0.00693479            | 0.41156691          |
| MTOR   | 114    | 0.01694883            | 0.44337117          |
| CXCR4  | 110    | 0.00416833            | 0.4273743           |
| HSPA5  | 108    | 0.0157237             | 0.43404255          |
| VCAM1  | 107    | 0.00550744            | 0.41632653          |
| APOE   | 105    | 0.0091125             | 0.42460685          |
| C3     | 104    | 0.00548989            | 0.40502978          |
| CXCL12 | 104    | 0.00353351            | 0.42236025          |
| COL1A1 | 101    | 0.00415999            | 0.40845384          |
| TPI1   | 100    | 0.00960708            | 0.41604351          |
| ISG15  | 100    | 0.00859203            | 0.40982143          |
| TIMP1  | 99     | 0.00241313            | 0.41670449          |
| PLEK   | 98     | 0.00962883            | 0.40316206          |
| ATP5A1 | 97     | 0.00640187            | 0.40772818          |
| TYROBP | 96     | 0.00449512            | 0.38138762          |
| CYBB   | 95     | 0.00606423            | 0.42352941          |
| SMAD3  | 94     | 0.01077158            | 0.42549247          |
| TGFB1  | 93     | 0.00480146            | 0.42206897          |
| COL1A2 | 92     | 0.00441335            | 0.4025433           |
| CCL5   | 92     | 0.00263859            | 0.41239892          |
| SPP1   | 92     | 0.00264041            | 0.41576087          |
| CS     | 91     | 0.00460332            | 0.40069838          |
| SDHA   | 90     | 0.00553902            | 0.39982578          |
| CAV1   | 90     | 0.00889528            | 0.43017807          |
| RBX1   | 89     | 0.00700816            | 0.39774697          |
| TLR7   | 89     | 0.00328058            | 0.41388638          |
| COL3A1 | 88     | 0.00327177            | 0.39594565          |
| C3AR1  | 88     | 0.00298753            | 0.39306358          |
| IRF8   | 88     | 0.002234              | 0.38636364          |
| CFL1   | 87     | 0.00582694            | 0.425               |
| FYN    | 87     | 0.00576856            | 0.42206897          |
| RAC2   | 87     | 0.00611073            | 0.41623215          |
| ENO1   | 86     | 0.00446053            | 0.42042592          |
| CANX   | 85     | 0.01072667            | 0.42236025          |
| DCN    | 85     | 0.00567503            | 0.39534884          |
